# Supplementary material for: Neural population dynamics underlying evidence accumulation in multiple rat brain regions
Source: eLife journal article supplement (doi:10.7554/elife.84955), 2024-08-20

### A example recovered PSTHs

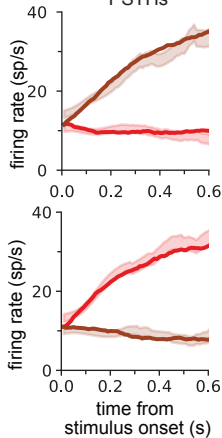

### B example recovered psychometric curve

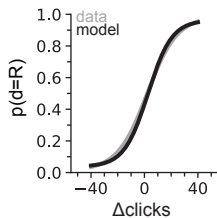

### C

#### example recovered parameters

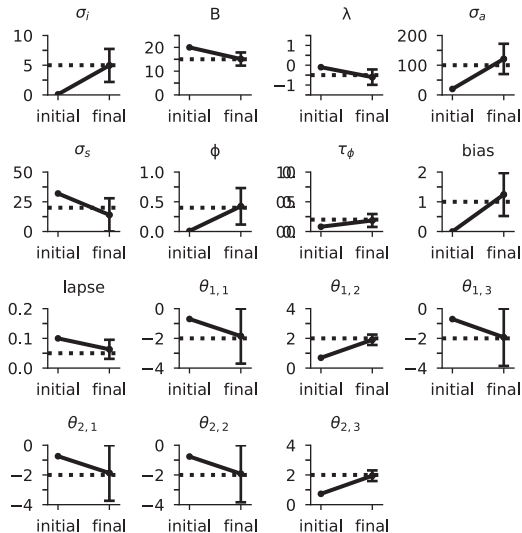

Supplement: supp [file elife_poa_e84955_Figure_1_figure_supplement_1.pdf › elife_poa_e84955_Figure_1_figure_supplement_1.pdf]
