# Supplementary figures and images for: Neural population dynamics underlying evidence accumulation in multiple rat brain regions
Source: eLife journal article supplement (doi:10.7554/elife.84955), 2024-08-20

# example recovered parameters

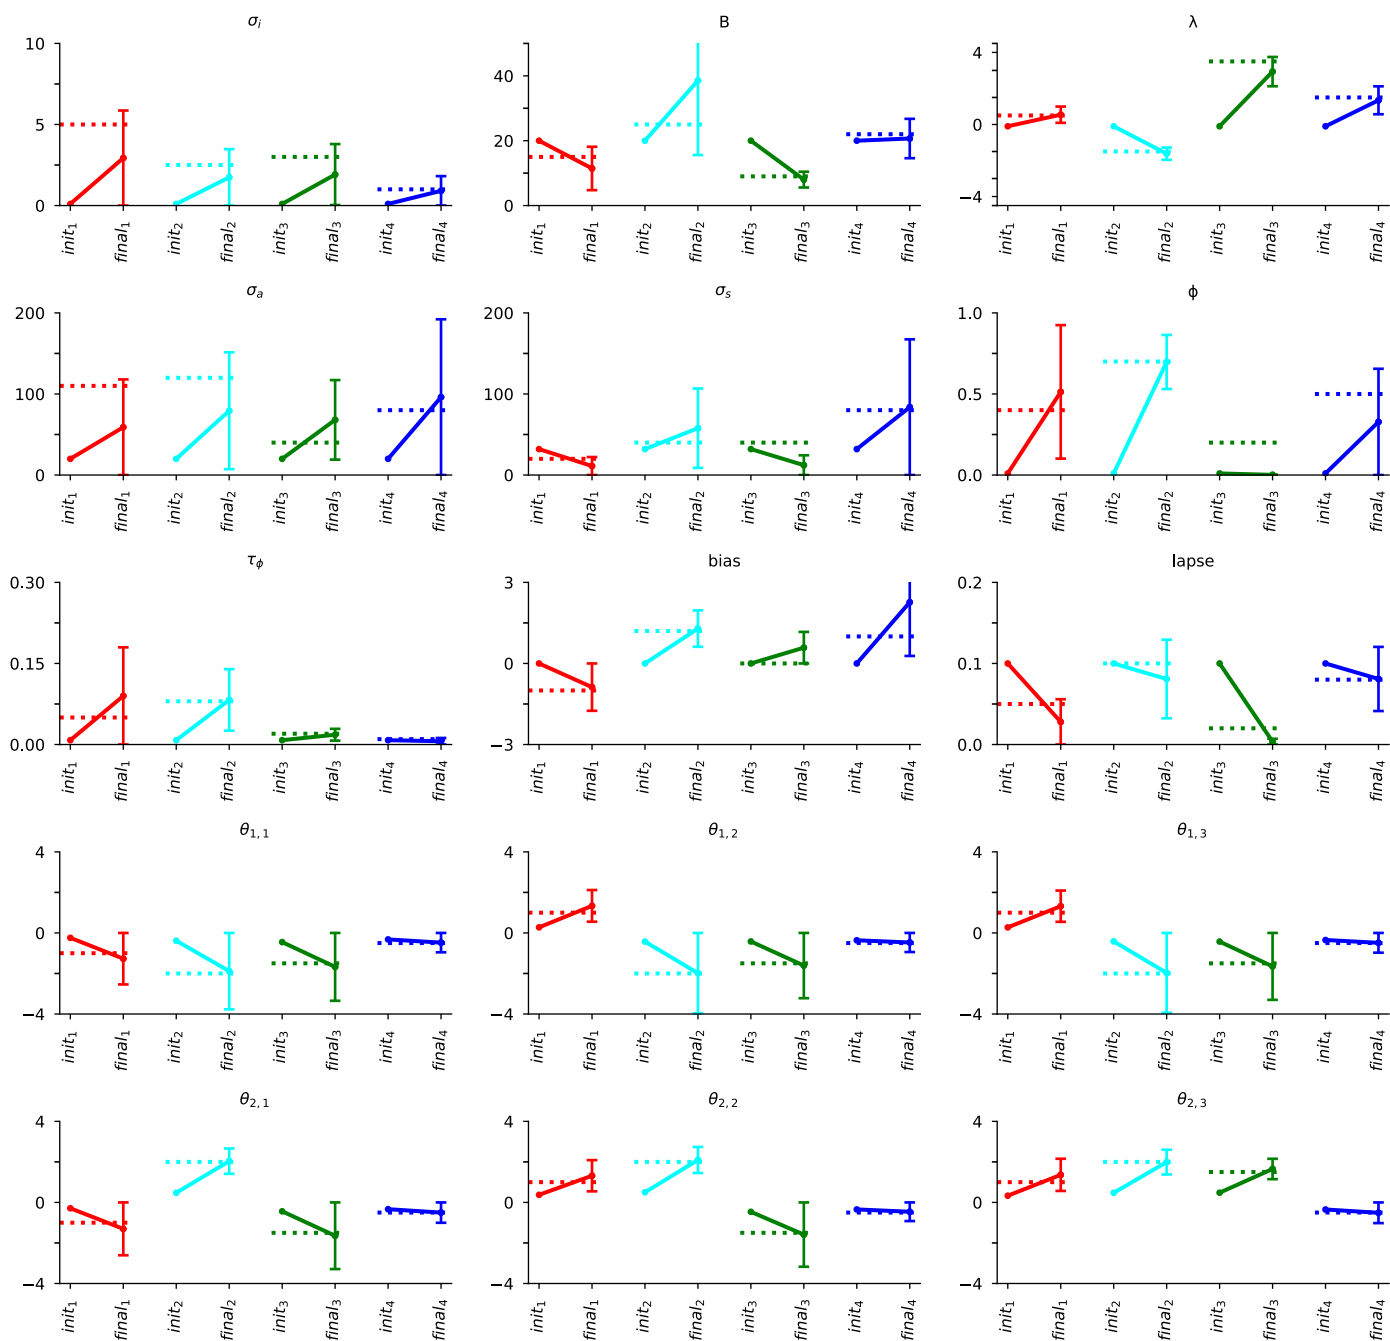

Supplement: supp [file elife_poa_e84955_Figure_1_figure_supplement_2.pdf › elife_poa_e84955_Figure_1_figure_supplement_2.pdf]

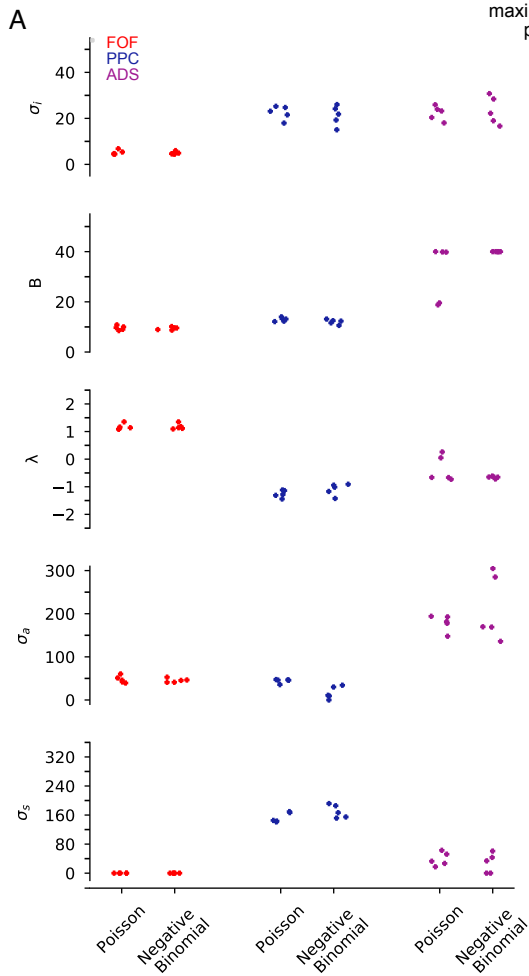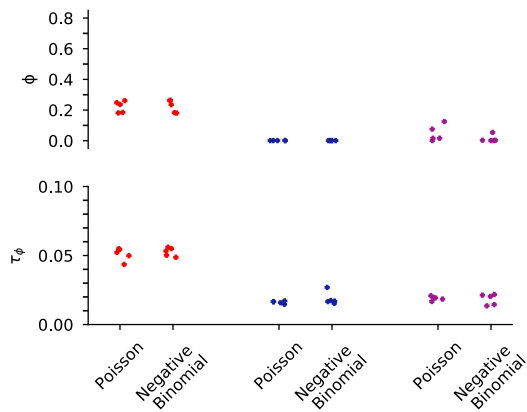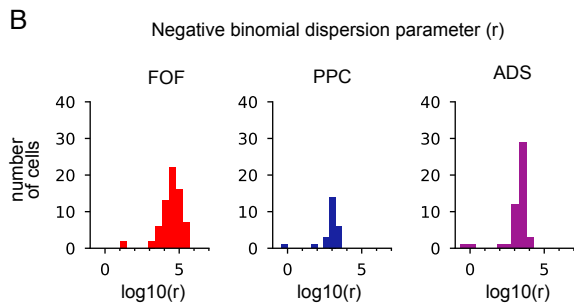

Supplement: supp [file elife_poa_e84955_Figure_3_figure_supplement_1.pdf › elife_poa_e84955_Figure_3_figure_supplement_1.pdf]

**A**

GLM

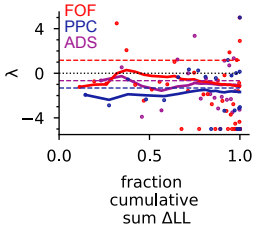**B**

bounded GLM

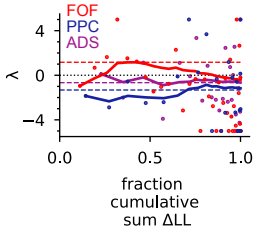

Supplement: supp [file elife_poa_e84955_Figure_3_figure_supplement_2.pdf › elife_poa_e84955_Figure_3_figure_supplement_2.pdf]

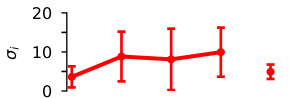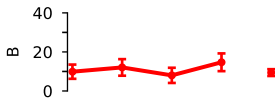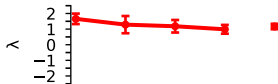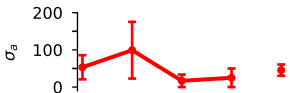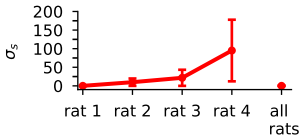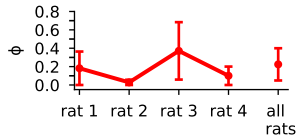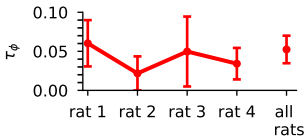

Supplement: supp [file elife_poa_e84955_Figure_3_figure_supplement_3.pdf › elife_poa_e84955_Figure_3_figure_supplement_3.pdf]

# maximum likelihood parameters

A

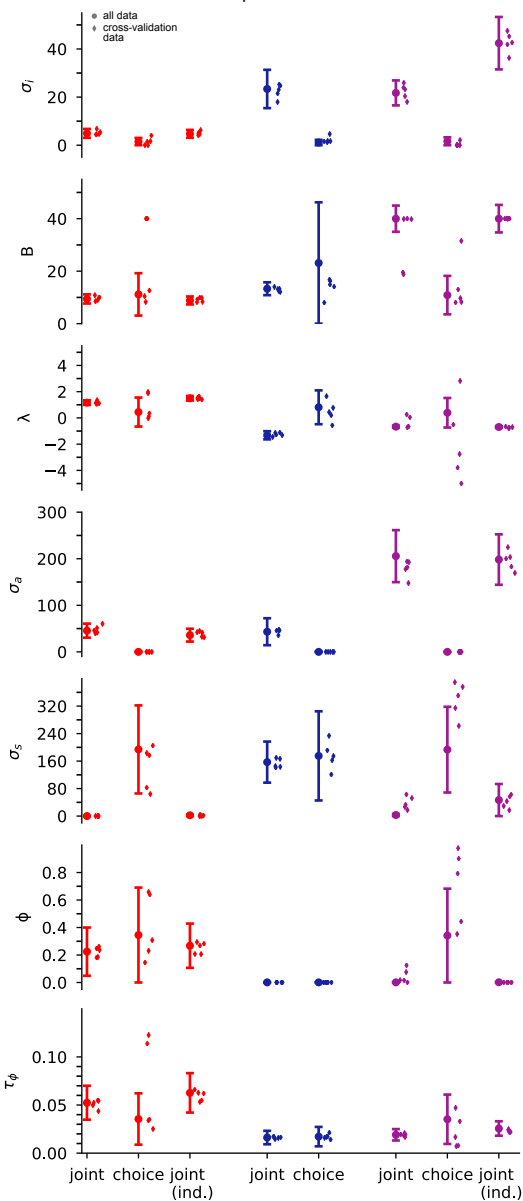

B

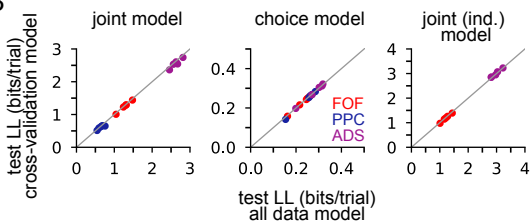

Supplement: supp [file elife_poa_e84955_Figure_3_figure_supplement_4.pdf › elife_poa_e84955_Figure_3_figure_supplement_4.pdf]

**A**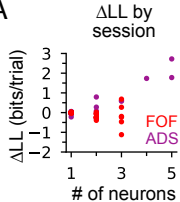**B**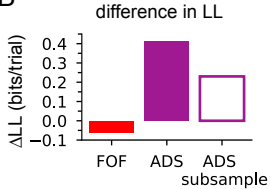**C**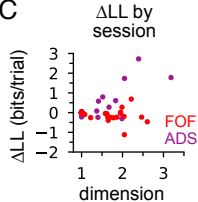**D**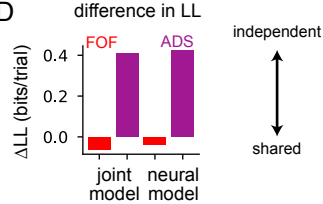

Supplement: supp [file elife_poa_e84955_Figure_4_figure_supplement_1.pdf › elife_poa_e84955_Figure_4_figure_supplement_1.pdf]

# maximum likelihood parameters

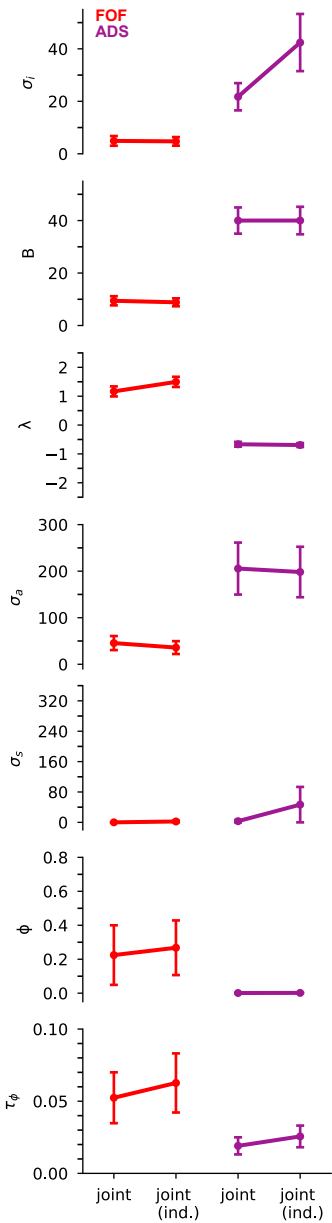

Supplement: supp [file elife_poa_e84955_Figure_4_figure_supplement_2.pdf › elife_poa_e84955_Figure_4_figure_supplement_2.pdf]

## choice decoding

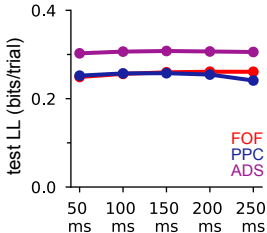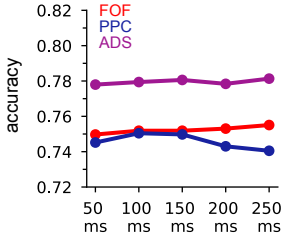

Supplement: supp [file elife_poa_e84955_Figure_6_figure_supplement_1.pdf › elife_poa_e84955_Figure_6_figure_supplement_1.pdf]

**A**

animal  
accuracy

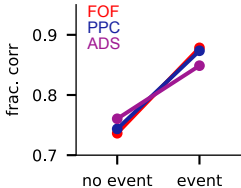**B**

joint model  
accuracy

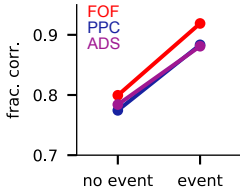

Supplement: supp [file elife_poa_e84955_Figure_6_figure_supplement_2.pdf › elife_poa_e84955_Figure_6_figure_supplement_2.pdf]
